# Supplementary material
Source: PubMed Central journal article supplement (PMC5816209)
Supplement: pnas.201720673SI.pdf [file pnas.201720673SI.pdf]

# Supporting Information

Wood et al. 10.1073/pnas.1720673115

## SI Materials and Methods

**Microscopy and Subcellular Fractionation.** The coding DNA sequence of *Drosophila Sirt4* (CG3187-RC) was inserted into either pAWF or pAWG (Drosophila Genomics Resource Center) to generate dSirt4-EGFP (pAWG-dSirt4) and dSirt4-3xFlag (pAWF-dSirt4) expression vectors, and subsequently transfected into S2 cells.

S2 cells were grown in Schneider's *Drosophila* medium supplemented with 10% (vol/vol) FBS and transfected by calcium phosphate precipitation as per standard protocols (1). Transiently transfected S2 cells were plated on acid-washed coverslips treated with Con A (2) and fixed by incubation in 3.7% formaldehyde in complete Schneider's *Drosophila* medium supplemented with 10% (vol/vol) FBS for 30 min at 28 °C. Cells were washed twice in PBS, quenched in 50 mM NH<sub>4</sub>Cl in PBS for 5 min, and permeabilized with 0.5% (wt/vol) Triton X-100/PBS for 5 min at room temperature. Cells were washed twice in PBS and incubated with mouse monoclonal M2 anti-Flag (Sigma F-1804; 1:500) and rabbit polyclonal MnSOD (Stressgen Biochemicals SOD-110; 1:250) antibodies in PBS for 1 h at room temperature, followed by washing in PBS and incubation with anti-mouse-Cy2 and anti-rabbit Cy5 antibodies (Jackson ImmunoResearch) in PBS for 1 h at room temperature. Where indicated, mitochondria were labeled by incubation of S2 cells with 200 nM MitoTracker Red CMXRos (Molecular Probes) for 30 min before fixation.

For subcellular fractionation, 4 × 10<sup>7</sup> S2 cells were homogenized in four packed cell volumes of hypotonic buffer [50 mM Hepes (pH 7.5), 50 mM KCl, 1 mM EDTA, 2 mM MgCl<sub>2</sub>, 1 mM DTT, 1 mM PMSF] using a Dounce homogenizer. Homogenates were adjusted to 0.25 M sucrose and centrifuged at 960 × g for 5 min at 4 °C to sediment nuclei and unbroken cells. The supernatant was subsequently centrifuged at 10,000 × g for 10 min at 4 °C to prepare a heavy membrane fraction enriched in mitochondria. The supernatant was then centrifuged at 100,000 × g for 60 min at 4 °C to sediment light membranes, with the remaining supernatant representing cytosol. The following antibodies were used for immunoblotting: α-tubulin (Sigma T-5168), Hsp90α (Stressgen Biochemicals SPS-771), Flag (Sigma F-1804), and MnSOD (Stressgen Biochemicals SOD-110).

**Bioinformatics.** To assess potential mitochondrial targeting sequences, amino acid sequences from the five *Drosophila* sirtuins were analyzed using MitoFates with standard parameters (3). To generate the phylogenetic tree in Fig. S1B, the five *Drosophila* and seven mouse sirtuin amino acid sequences were input at [www.phylogeny.fr](http://www.phylogeny.fr) using the "one-click" mode (4). This pipeline runs the following programs in succession: MUSCLE, GBlocks, PhyML, and TreeDyn.

**Quantitative PCR.** Total RNA from fat bodies dissected from fed and fasted female flies (*n* = 25) was reverse-transcribed, and the resulting cDNA was used as input for measuring *dSirt4* transcript levels by qPCR. The delta delta cycle threshold method was used to quantify *dSirt4* expression, with β-tubulin as an endogenous control. Primer sequences were as follows: β-tubulin-forward (F), ACATCCCGCCCCGTGGTC; β-tubulin-reverse (R), AGAAA-GCCTTGCGCCTGAACATAG; Sirt4-F, CCGAAATGTTGTG-GAGGTTC; and Sirt4-R, ATTTAGCGACGCCAGTATGC.

**Mitochondrial Respiration Assays.** Mitochondrial preparations were made from 25 live female flies by gentle homogenization in mitochondrial homogenization buffer [225 mM mannitol, 75 mM sucrose, 10 mM 3-(N-morpholino)propanesulfonic acid, 1 mM EGTA, 0.5% BSA (pH 7.2)]. Samples were centrifuged at 300 × g for 5 min at 4 °C to pellet nuclei and debris. Supernatant was then centrifuged at 6,000 × g to pellet mitochondria, which were resuspended in 100 μL of mitochondrial respiration buffer [225 mM mannitol, 75 mM sucrose, 10 mM KCl, 10 mM Tris·HCl, 5 mM KH<sub>2</sub>PO<sub>4</sub>, 0.1% BSA (pH 7.2)]. Respiration was assayed using a Clark electrode in a 1-mL reaction volume, with 5 μL of 1 M pyruvate and 5 μL of 1 M malate as substrates. Respiratory control ratios were calculated as state III (active)/state IV (ADP-depleted) rates. Three biological replicates were performed for each time point.

**ATP Assays.** ATP assays were performed as described by Tennessen et al. (5). Either five whole animals, or 10 eviscerated female abdomens (containing primarily fat body) were used as inputs for the assay, with five biological replicates for each sample.

1. Schetz JA, Shankar EPN (2004) Protein expression in the *Drosophila* Schneider 2 cell system. *Curr Protoc Neurosci* Chapter 4:Unit 4.16.
2. Rogers SL, Rogers GC, Sharp DJ, Vale RD (2002) *Drosophila* EB1 is important for proper assembly, dynamics, and positioning of the mitotic spindle. *J Cell Biol* 158:873–884.
3. Fukasawa Y, et al. (2015) MitoFates: Improved prediction of mitochondrial targeting sequences and their cleavage sites. *Mol Cell Proteomics* 14:1113–1126.

4. Dereeper A, et al. (2008) Phylogeny.fr: Robust phylogenetic analysis for the non-specialist. *Nucleic Acids Res* 36:W465–W469.
5. Tennessen JM, Barry WE, Cox J, Thummel CS (2014) Methods for studying metabolism in *Drosophila*. *Methods* 68:105–115.



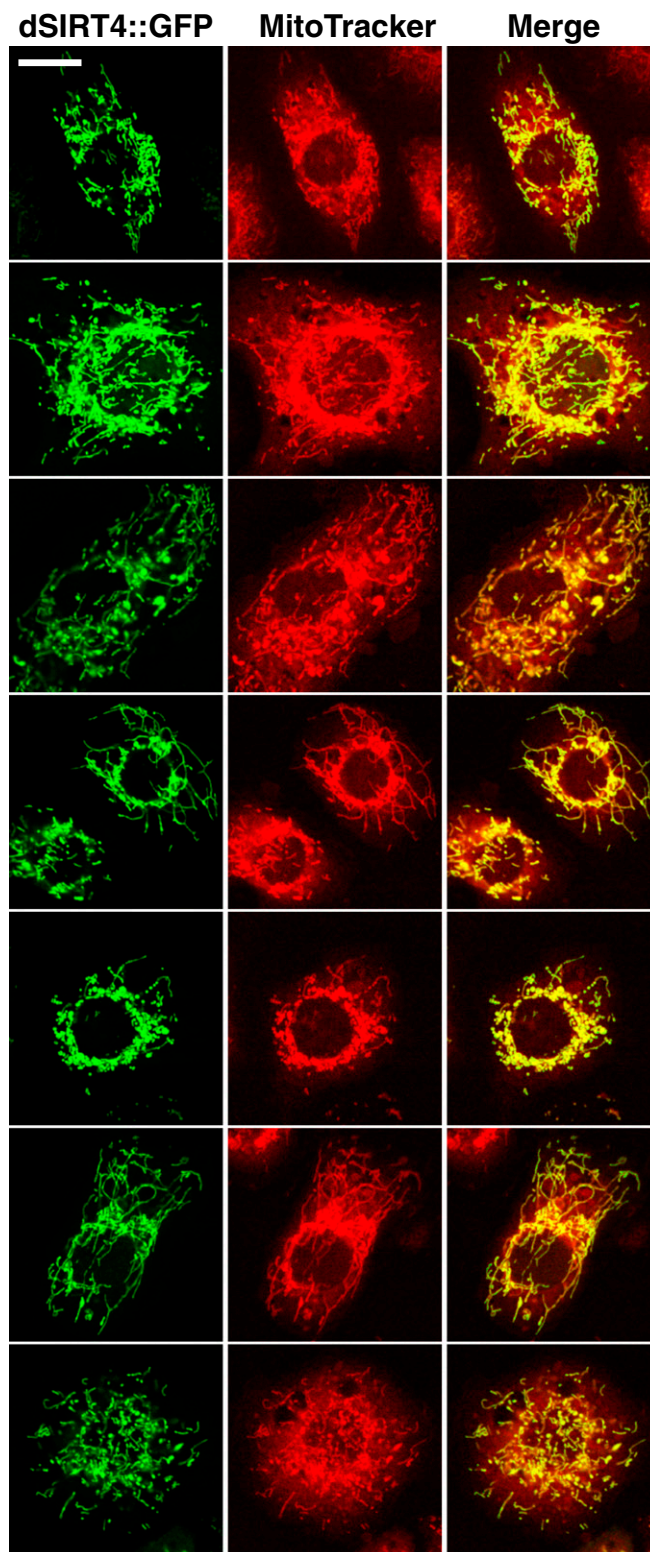

Fig. S2. Additional images showing dSirt4::GFP localizes to mitochondria in S2 cells. (Scale bar, 5  $\mu$ m.)

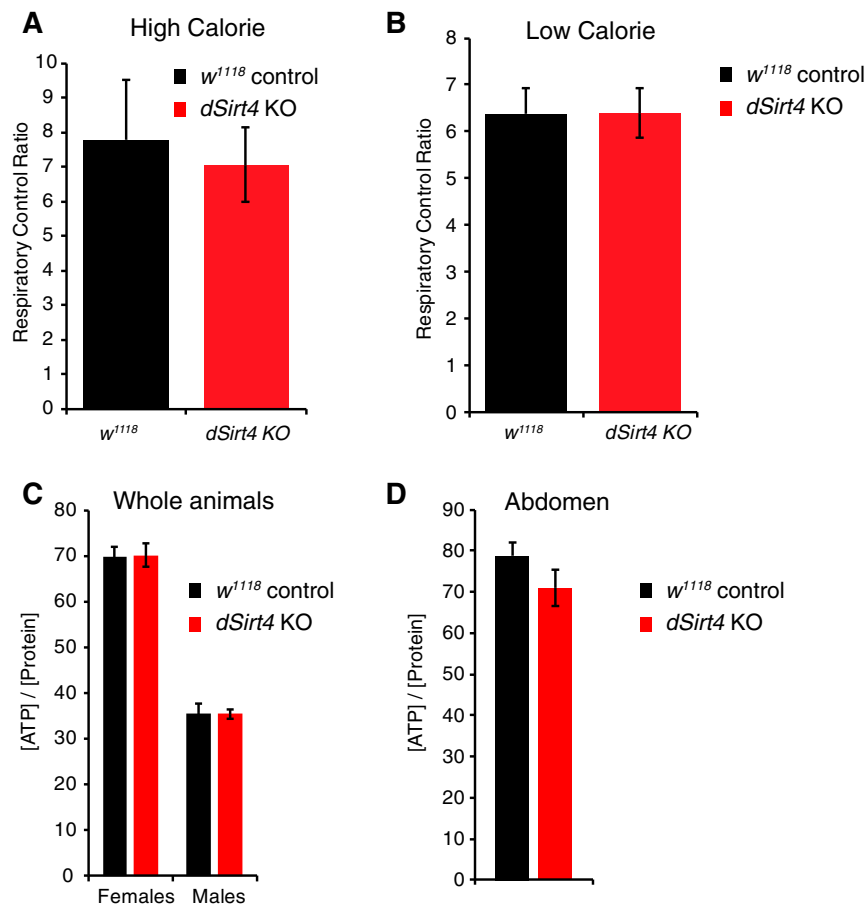

**Fig. S3.** Mitochondria of *dSirt4* knockout (KO) flies are not grossly impaired. Respiratory control ratios (state III/state IV) of live mitochondria extracted from female flies maintained on high-calorie (A, 15% SY) or low-calorie (B, 5% SY) food are shown. Data represent averages of three independent biological replicates; differences between samples are not significant. (C) ATP levels are normal in *dSirt4* KO flies. ATP levels in whole flies (micromolar) normalized to total protein content (milligrams per milliliter) are shown for both female and male *w<sup>1118</sup>* control (black) and *dSirt4* KO (red) flies. (D) ATP levels measured as in C from eviscerated abdomens of female flies. Eviscerated abdomens contain primarily fat body tissue. Data in C and D represent the average of five independent biological replicates.





**Table S1. Statistics for all lifespan experiments described in the current study**

| Genotype                             | Replicate | Sex | Food   | <i>n</i> | Median lifespan | Mean lifespan | Maximum lifespan | Log-rank <i>P</i> value | Change in median lifespan vs. control, % | Change in maximal lifespan vs. control, % |
|--------------------------------------|-----------|-----|--------|----------|-----------------|---------------|------------------|-------------------------|------------------------------------------|-------------------------------------------|
| w <sup>1118</sup> control            | 1         | F   | 5% SY  | 244      | 86              | 83.93         | 97.5             |                         |                                          |                                           |
| dSirt4 KO                            | 1         | F   | 5% SY  | 246      | 62              | 62.44         | 74               | 1.00E-10                | -27.9                                    | -24.1                                     |
| w <sup>1118</sup> control            | 1         | F   | 15% SY | 243      | 66              | 65.23         | 75.8             |                         |                                          |                                           |
| dSirt4 KO                            | 1         | F   | 15% SY | 251      | 48              | 49.16         | 66.5             | 1.00E-10                | -27.3                                    | -12.3                                     |
| w <sup>1118</sup> control            | 2         | F   | 5% SY  | 233      | 89              | 87.04         | 99.5             |                         |                                          |                                           |
| dSirt4 KO                            | 2         | F   | 5% SY  | 242      | 53              | 58.02         | 75.8             | 1.00E-10                | -40.4                                    | -23.8                                     |
| w <sup>1118</sup> control            | 2         | F   | 15% SY | 226      | 71              | 69.5          | 78               |                         |                                          |                                           |
| dSirt4 KO                            | 2         | F   | 15% SY | 242      | 51              | 52.3          | 66.7             | 1.00E-10                | -28.2                                    | -14.5                                     |
| da-GAL4 > w <sup>1118</sup> control  | 1         | F   | 5% SY  | 238      | 65              | 60.1          | 81.8             |                         |                                          |                                           |
| da-GAL4 > UAS-dSirt4                 | 1         | F   | 5% SY  | 240      | 78              | 72.55         | 89.6             | 1.00E-10                | 20.0                                     | 9.5                                       |
| da-GAL4 > w <sup>1118</sup> control  | 2         | F   | 5% SY  | 243      | 57              | 55.53         | 71.2             |                         |                                          |                                           |
| da-GAL4 > UAS-dSirt4                 | 2         | F   | 5% SY  | 222      | 67              | 66.62         | 98               | 1.00E-10                | 17.5                                     | 37.6                                      |
| tub-GAL4 > w <sup>1118</sup> control | 1         | F   | 5% SY  | 236      | 63              | 62.82         | 85.2             |                         |                                          |                                           |
| tub-GAL4 > UAS-dSirt4                | 1         | F   | 5% SY  | 224      | 71              | 71.59         | 93.9             | 1.00E-10                | 12.7                                     | 10.2                                      |
| tub-GAL4 > w <sup>1118</sup> control | 2         | F   | 5% SY  | 240      | 69              | 67.83         | 88.3             |                         |                                          |                                           |
| tub-GAL4 > UAS-dSirt4                | 2         | F   | 5% SY  | 227      | 79              | 73.96         | 97.9             | 1.00E-10                | 14.5                                     | 10.9                                      |
| ppl-GAL4 > w <sup>1118</sup> control | 1         | F   | 15% SY | 245      | 57              | 53.6          | 76.4             |                         |                                          |                                           |
| ppl-GAL4 > UAS-dSirt4                | 1         | F   | 15% SY | 246      | 65              | 65.8          | 87.2             | 1.00E-10                | 14.0                                     | 14.1                                      |
| ppl-GAL4 > w <sup>1118</sup> control | 2         | F   | 15% SY | 72       | 64              | 62.61         | 84.9             |                         |                                          |                                           |
| ppl-GAL4 > UAS-dSirt4                | 2         | F   | 15% SY | 75       | 72              | 66.64         | 86.8             | 0.0493                  | 12.5                                     | 2.2                                       |
| ppl-GAL4 > w <sup>1118</sup> control | 3         | F   | 5% SY  | 234      | 74              | 70.52         | 91.3             |                         |                                          |                                           |
| ppl-GAL4 > UAS-dSirt4                | 3         | F   | 5% SY  | 238      | 86              | 77.25         | 93.6             | 3.90E-09                | 16.2                                     | 2.5                                       |
| w <sup>1118</sup> control            | 1         | M   | 5% SY  | 233      | 83              | 81.13         | 97.7             |                         |                                          |                                           |
| dSirt4 KO                            | 1         | M   | 5% SY  | 185      | 69              | 65.32         | 82.6             | 1.00E-10                | -16.9                                    | -15.5                                     |
| w <sup>1118</sup> control            | 1         | M   | 15% SY | 243      | 69              | 66.31         | 82.2             |                         |                                          |                                           |
| dSirt4 KO                            | 1         | M   | 15% SY | 198      | 51              | 51.23         | 66.3             | 1.00E-10                | -26.1                                    | -19.3                                     |
| w <sup>1118</sup> control            | 2         | M   | 5% SY  | 243      | 65              | 61.23         | 84.4             |                         |                                          |                                           |
| dSirt4 KO                            | 2         | M   | 5% SY  | 241      | 52              | 49.27         | 72.6             | 1.00E-10                | -20.0                                    | -14.0                                     |
| w <sup>1118</sup> control            | 2         | M   | 15% SY | 245      | 52              | 45.25         | 71.9             |                         |                                          |                                           |
| dSirt4 KO                            | 2         | M   | 15% SY | 245      | 31              | 36.58         | 65.4             | 1.00E-10                | -40.4                                    | -9.0                                      |
| da-GAL4 > w <sup>1118</sup> control  | 1         | M   | 5% SY  | 244      | 61              | 61.18         | 82.6             |                         |                                          |                                           |
| da-GAL4 > UAS-dSirt4                 | 1         | M   | 5% SY  | 235      | 73              | 71.68         | 95.6             | 1.00E-10                | 19.7                                     | 15.7                                      |
| da-GAL4 > w <sup>1118</sup> control  | 2         | M   | 5% SY  | 245      | 57              | 57.82         | 79.1             |                         |                                          |                                           |
| da-GAL4 > UAS-dSirt4                 | 2         | M   | 5% SY  | 171      | 61              | 62.54         | 89.8             | 0.000009                | 7.0                                      | 13.5                                      |
| tub-GAL4 > w <sup>1118</sup> control | 1         | M   | 5% SY  | 215      | 71              | 70.58         | 93.3             |                         |                                          |                                           |
| tub-GAL4 > UAS-dSirt4                | 1         | M   | 5% SY  | 219      | 73              | 72.91         | 92.6             | 0.3387                  | 2.8                                      | -0.8                                      |
| tub-GAL4 > w <sup>1118</sup> control | 2         | M   | 5% SY  | 226      | 81              | 77.56         | 94.2             |                         |                                          |                                           |
| tub-GAL4 > UAS-dSirt4                | 2         | M   | 5% SY  | 233      | 75              | 73.41         | 89.3             | 0.0000014               | -7.4                                     | -5.2                                      |
| ppl-GAL4 > w <sup>1118</sup> control | 1         | M   | 15% SY | 238      | 49              | 49.42         | 64.3             |                         |                                          |                                           |
| ppl-GAL4 > UAS-dSirt4                | 1         | M   | 15% SY | 248      | 59              | 56.43         | 70.6             | 1.00E-10                | 20.4                                     | 9.8                                       |
| ppl-GAL4 > w <sup>1118</sup> control | 2         | M   | 15% SY | 93       | 62              | 61.1          | 77.3             |                         |                                          |                                           |
| ppl-GAL4 > UAS-dSirt4                | 2         | M   | 15% SY | 92       | 76              | 71.98         | 84.9             | 1.00E-10                | 22.6                                     | 9.8                                       |
| ppl-GAL4 > w <sup>1118</sup> control | 3         | M   | 5% SY  | 234      | 64              | 60.79         | 77.2             |                         |                                          |                                           |
| ppl-GAL4 > UAS-dSirt4                | 3         | M   | 5% SY  | 240      | 70              | 66.76         | 82.2             | 1.00E-10                | 9.4                                      | -27.9                                     |

For each experiment, *n* values (number of individuals assayed), mean lifespan, median lifespan, and maximal lifespan, calculated as the mean lifespan of the latest surviving 10% of the cohort, as well as the *P* value for the log-rank statistical test, are reported. Percent change in median lifespan compared with controls is also presented. Each lifespan experiment was repeated at least twice with similar results, and representative experiments are shown in the figures, with the presented lifespans labeled as replicate 1 in this table. F, female; M, male.



Table S2. *P* values for all pairwise comparisons presented in Fig. 5 (unpaired two-tailed *t* test)

| Metabolite                | Control fed vs. control fasted | Control fed vs. KO fed | Control fed vs. KO fasted | Control fasted vs. KO fed | Control fasted vs. KO fasted | KO fed vs. KO fasted |
|---------------------------|--------------------------------|------------------------|---------------------------|---------------------------|------------------------------|----------------------|
| Lactic acid               | 0.402                          | 0.051                  | 0.032                     | 0.954                     | 0.586                        | 0.173                |
| Pyruvic acid              | 0.471                          | 0.057                  | 0.128                     | 0.031                     | 0.062                        | 0.187                |
| DHAP                      | 0.294                          | 0.002                  | 0.691                     | 9.52E-04                  | 0.351                        | 2.88E-05             |
| Phosphoenolpyruvate       | 0.701                          | 0.014                  | 0.877                     | 0.013                     | 0.751                        | 0.008                |
| Ribose                    | 0.848                          | 0.015                  | 0.002                     | 0.008                     | 8.02E-05                     | 0.583                |
| D-ribose-5-phosphate      | 0.029                          | 3.22E-05               | 0.051                     | 6.87E-06                  | 9.97E-04                     | 1.39E-04             |
| Glucose-1-phosphate       | 0.029                          | 2.18E-06               | 1.20E-05                  | 1.84E-07                  | 3.21E-04                     | 2.64E-09             |
| Glucose-6-phosphate       | 0.068                          | 1.52E-04               | 7.37E-06                  | 1.41E-05                  | 1.77E-04                     | 3.11E-08             |
| Valine                    | 9.96E-04                       | 0.003                  | 5.68E-05                  | 0.117                     | 3.47E-04                     | 0.004                |
| Leucine                   | 0.002                          | 0.009                  | 1.86E-05                  | 0.103                     | 4.01E-04                     | 0.201                |
| Isoleucine                | 1.52E-04                       | 0.003                  | 1.01E-06                  | 0.180                     | 6.78E-05                     | 0.049                |
| Citric acid               | 0.002                          | 0.749                  | 0.308                     | 0.002                     | 0.003                        | 0.212                |
| Isocitric acid            | 0.225                          | 0.055                  | 0.152                     | 0.840                     | 0.823                        | 0.557                |
| Succinic acid             | 0.080                          | 0.002                  | 0.022                     | 0.175                     | 0.251                        | 0.844                |
| Fumaric acid              | 0.143                          | 0.259                  | 0.001                     | 0.859                     | 4.90E-04                     | 0.079                |
| Malic acid                | 0.633                          | 0.654                  | 0.009                     | 0.875                     | 9.78E-04                     | 0.089                |
| Lauric acid               | 0.002                          | 0.042                  | 1.32E-06                  | 3.48E-04                  | 0.154                        | 3.26E-06             |
| Myristic acid             | 0.183                          | 0.103                  | 0.016                     | 0.050                     | 0.779                        | 0.036                |
| Palmitic acid             | 0.203                          | 0.178                  | 0.010                     | 0.669                     | 0.342                        | 0.838                |
| Stearic acid              | 0.276                          | 0.951                  | 0.540                     | 0.309                     | 0.578                        | 0.542                |
| Linoleic acid             | 0.154                          | 0.115                  | 9.40E-07                  | 0.312                     | 1.23E-05                     | 0.018                |
| Oleic acid                | 0.425                          | 0.092                  | 2.41E-04                  | 0.137                     | 1.92E-04                     | 0.132                |
| Laurate C12:0             | 0.007                          | 0.039                  | 1.47E-06                  | 0.727                     | 0.006                        | 0.010                |
| Myristate C14:0           | 0.177                          | 0.058                  | 0.013                     | 0.649                     | 0.487                        | 0.823                |
| Myristoleate C14:1        | 3.22E-04                       | 0.109                  | 2.20E-05                  | 0.006                     | 2.48E-04                     | 1.03E-04             |
| Pentadecanoate C15:0      | 0.302                          | 0.504                  | 0.335                     | 0.584                     | 0.770                        | 0.708                |
| Palmitate C16:0           | 0.445                          | 0.152                  | 0.045                     | 0.317                     | 0.161                        | 0.986                |
| Palmitoleate C16:1n-7     | 0.058                          | 0.097                  | 0.036                     | 0.888                     | 0.369                        | 0.484                |
| Stearate C18:0            | 0.144                          | 0.737                  | 4.13E-04                  | 0.110                     | 0.018                        | 4.30E-04             |
| Oleate C18:1n-9           | 0.953                          | 0.232                  | 0.159                     | 0.322                     | 0.192                        | 0.040                |
| Linolelaidate C18:2n-6    | 0.944                          | 0.605                  | 0.017                     | 0.675                     | 0.024                        | 0.021                |
| Linoleate C18:2n-6        | 0.950                          | 0.607                  | 0.017                     | 0.674                     | 0.024                        | 0.021                |
| Arachidate C20:0          | 0.471                          | 0.312                  | 0.069                     | 0.808                     | 0.046                        | 0.028                |
| Behenate C22:0            | 0.289                          | 0.281                  | 7.06E-04                  | 0.774                     | 0.020                        | 0.002                |
| Docosadienoate C22:2n-6   | 0.727                          | 0.890                  | 0.008                     | 0.695                     | 0.016                        | 0.029                |
| Docosahexaenoate C22:6n-3 | 0.161                          | 0.019                  | 2.19E-04                  | 0.876                     | 0.007                        | 0.002                |
| Lignocerate C24:0         | 0.443                          | 0.598                  | 0.017                     | 0.689                     | 0.102                        | 0.016                |

Nonsignificant *P* values above 0.05 are displayed in black,  $0.05 > P > 0.01$  is displayed in red,  $0.01 > P > 0.001$  is displayed in blue, and  $P < 0.001$  is displayed in green. KO, knockout.
